# Supplementary material
Source: ML conference proceedings conference paper supplement (https://proceedings.neurips.cc/paper_files/paper/2016/hash/a284df1155ec3e67286080500df36a9a-Abstract.html)
Supplement: Supplementary file 1 [file a284df1155ec3e67286080500df36a9a-Supplemental.zip]

Archive with 1 entries (1 files):
- blind_attacks_proofs.pdf
