# Supplementary material
Source: ML conference proceedings conference paper supplement (https://proceedings.neurips.cc/paper_files/paper/2016/hash/a284df1155ec3e67286080500df36a9a-Abstract.html)
Supplement: Supplementary file 1 [file a284df1155ec3e67286080500df36a9a-Supplemental.zip › blind_attacks_proofs.pdf]

# Appendix

## 1 Proof of theorem 1

*Proof.* The proof follows from two lemmas. The first is directly from [1]; the second bounds the difference in densities in terms of the total variation distance.

**Lemma 1.1.**

$$\log \frac{a}{b} \leq \frac{|a - b|}{\min(a, b)} \quad \forall \quad a, b \in \mathbb{R}_+.$$

*Proof.* See [1]. ■

**Lemma 1.2.**

$$p_1(z) - p_2(z) \leq \alpha \|F_1 - F_2\|_{\text{TV}}.$$

*Proof.*

$$\begin{aligned} p_1(z) - p_2(z) &= \int_{\mathcal{Z}} p(z|x) [dF_1(x) - dF_2(x)] \\ &\leq (\sup_x p(z|x) - \inf_x p(z|x)) \int_{\mathcal{Z}} [dF_1(x) - dF_2(x)] \\ &= \sup_{x, x'} |p(z|x) - p(z|x')| \|F_1 - F_2\|_{\text{TV}}. \end{aligned}$$

Now we inspect  $\sup_{x, x'} |p(z|x) - p(z|x')|$ . Recall  $p(z|x) = \alpha \mathbb{1}\{z = x\} + (1 - \alpha)g(z)$ . It follows:

$$\begin{aligned} \sup_{x, x'} |p(z|x) - p(z|x')| &= \sup_{x, x'} [\alpha \mathbb{1}\{z = x\} + (1 - \alpha)g(z) - \alpha \mathbb{1}\{z = x'\} - (1 - \alpha)g(z)] \\ &= \alpha. \end{aligned}$$
■

We use Lemma 1.1 and 1.2 to derive the result.

$$\begin{aligned}
& D_{\text{KL}}(P_1||P_2) + D_{\text{KL}}(P_2||P_1) \\
&= \int_{\mathcal{Z}} (p_1(z) - p_2(z)) \log \frac{p_1(z)}{p_2(z)} dz \\
&\leq \int_{\mathcal{Z}} |p_1(z) - p_2(z)| \frac{|p_1(z) - p_2(z)|}{\min(p_1(z), p_2(z))} dz \quad \text{Lemma 1.1} \\
&\leq \alpha \|F_1 - F_2\| \int_{\mathcal{Z}} |p_1(z) - p_2(z)| \frac{1}{\min(p_1(z), p_2(z))} dz \quad \text{Lemma 1.2} \\
&\leq \alpha \frac{\|F_1 - F_2\|_{\text{TV}}}{(1 - \alpha)g} \int_{\mathcal{Z}} |p_1(z) - p_2(z)| dz \\
&\quad \text{as } \min(p_1(z), p_2(z)) \geq \inf_x p(z|x) \geq (1 - \alpha)g \\
&= \frac{\alpha^2}{(1 - \alpha)} \|F_1 - F_2\|_{\text{TV}}^2 \text{Vol}(\mathcal{Z}) \quad \text{as } g = \frac{1}{\text{Vol}(\mathcal{Z})}.
\end{aligned}$$

□

### 1.1 Proof of corollary 1.1

Proof is direct by applying the upper bound on KL divergence stated in Theorem 1 to the usual form of the Le Cam bound presented in (2) in our main text.

### 1.2 Proof of corollary 1.2

We have a packing  $\mathcal{V} \subset \Theta$  such that  $\|\theta_i - \theta_j\|_2^2 \geq 2\delta$  for all  $i \neq j$ , and for some fixed  $\tau$ ,

$$D_{\text{KL}}(F_{\theta_i}||F_{\theta_j}) \leq \tau\delta \quad \forall i, j.$$

Pinsker's inequality implies that

$$\|F_i - F_j\|_{\text{TV}}^2 \leq \frac{1}{2}\tau\delta.$$

Combining this with Theorem 1 gives an upper bound on the KL divergence between the observed distributions:

$$\sum_i \sum_j D_{\text{KL}}(F_{\theta_i}||F_{\theta_j}) \leq \frac{\alpha^2}{2(1 - \alpha)} \tau\delta \text{Vol}(\mathcal{Z}).$$

The result follows from using this in the upper bound on mutual information (4) and applying the usual Fano inequality (3) from our main text.

## 2 Proof of lemma 1

*Proof.*

$$\begin{aligned}
& D_{\text{KL}}(P_1||P_2) + D_{\text{KL}}(P_2||P_1) \\
&= \int_{\mathcal{Z}} (p_1(z) - p_2(z)) \log \frac{p_1(z)}{p_2(z)} dz \\
&= \int_{\mathcal{Z}} |p_1(z) - p_2(z)| \left| \log \frac{p_1(z)}{p_2(z)} \right| dz \\
&\leq \int_{\mathcal{Z}} |p_1(z) - p_2(z)| \frac{|p_1(z) - p_2(z)|}{\min(p_1(z), p_2(z))} dz \quad \text{Lemma 1.1} \\
&\leq \|P_1 - P_2\|_{\text{TV}}^2 \int_{\mathcal{Z}} \frac{1}{\min(p_1(z), p_2(z))} dz \\
&\leq \frac{\|P_1 - P_2\|_{\text{TV}}^2}{\gamma} \text{Vol}(\mathcal{Z}) \quad \text{where } \gamma = \min_z [\min_z g_1(z), \min_z g_2(z)].
\end{aligned}$$

We note that

$$\|P_1 - P_2\|_{\text{TV}} = \frac{1}{2} \int_{\mathcal{Z}} |\alpha(f_1(z) - f_2(z)) - (1 - \alpha)(g_2(z) - g_1(z))| dz.$$

For  $\alpha \leq 0.5$  we can choose  $g_1(z) = \frac{\alpha f_2(z)}{(1-\alpha)} + c$ ,  $g_2(z) = \frac{\alpha f_1(z)}{(1-\alpha)} + c$ , such that  $\|P_1 - P_2\|_{\text{TV}} = 0$  and  $\gamma > 0$ . This choice results in a minimax risk lower bounded independent of the sample size by

$$\mathfrak{M}_n \geq L(\theta_1, \theta_2) \left(1 - \frac{\log 2}{\log N}\right).$$

Intuitively, with  $\alpha < 0.5$  the attacker is free to inject points from a distribution  $G_\phi$  from the same family  $\mathcal{F}$  as  $F_\theta$  but with different parameters, 'mimicing' a distribution from  $\mathcal{F}$ . This makes learning possible only up to permutation.  $\square$

## 3 Proof of theorem 2

*Proof.*

$$\begin{aligned}
& D_{\text{KL}}(P_1||P_2) + D_{\text{KL}}(P_2||P_1) \\
&= \int_{\mathcal{Z}} |p_1(z) - p_2(z)| \left| \log \frac{\alpha f_1(z) + (1 - \alpha)f_2(z)}{\alpha f_2(z) + (1 - \alpha)f_1(z)} \right| dz \\
&\leq \int_{\mathcal{Z}} |p_1(z) - p_2(z)| \log \frac{\alpha}{1 - \alpha} dz \\
&= 2\|P_1 - P_2\|_{\text{TV}} \log \frac{\alpha}{1 - \alpha} \\
&= (2\alpha - 1)\|F_1 - F_2\|_{\text{TV}} \log \left(1 + \frac{2\alpha - 1}{1 - \alpha}\right) \\
&\leq \frac{(2\alpha - 1)^2}{1 - \alpha} \|F_1 - F_2\|_{\text{TV}}.
\end{aligned}$$

□

### 3.1 Proof of corollary 2.1

Proof is direct by applying the upper bound on KL divergence in Theorem 2 to the usual form of the Le Cam bound presented in (2) in our main text.

## References

- (1) J. Duchi, M. Wainwright and M. Jordan, *arXiv preprint arXiv:1302.3203v4*, 2014.
